# Supplementary material for: Identification of Fungal Community Associated with Deterioration of Optical Observation Instruments of Museums in Northern Vietnam
Source: MDPI journal article supplement (doi:10.3390/app11125351), 2021-06-09
Supplement: s1 [file s1]

# Supplementary Materials: Identification of Fungal Community Associated with Deterioration of Optical Observation Instruments of Museums in Northern Vietnam

Cao Cuong Ngo <sup>1,2,†</sup>, Quang Huy Nguyen <sup>3,†</sup>, Thu Hoai Nguyen <sup>2</sup>, Ngoc Tung Quach <sup>1,4</sup>, Pravin Dudhagara <sup>5</sup>, Thi Hanh Nguyen Vu <sup>1,4</sup>, Thi Thanh Xuan Le <sup>1</sup>, Thi Thu Hang Le <sup>3</sup>, Thi Thu Hong Do <sup>2</sup>, Van Duc Nguyen <sup>6</sup>, Nam Trung Nguyen <sup>1,4</sup> and Quyet-Tien Phi <sup>1,4,\*</sup>

**Table S1.** Effect of mycelium growing on glass plates after a 28-days by alcohol-bleached test as per ISO 9022-11 on light transmission at wavelengths of visible light range from 400 nm to 800 nm

| Measurement<br>wavelength<br>(nm) | Transmission coefficient (%) |                                  |                                                 |                                     |                                          |                                          |                                  |                                        |                                      |
|-----------------------------------|------------------------------|----------------------------------|-------------------------------------------------|-------------------------------------|------------------------------------------|------------------------------------------|----------------------------------|----------------------------------------|--------------------------------------|
|                                   | Control                      | <i>Humicola insolens</i> BMLC5-5 | <i>Aspergillus ochraceopetaliformis</i> BMLC1-2 | <i>Penicillium oxalicum</i> BTBB2-2 | <i>Byssoschlamys spectabilis</i> BXMA1-2 | <i>Torulomyces trachyspermus</i> BTBB1-3 | <i>Aspergillus niger</i> BXMA5-2 | <i>Penicillium ra-musculum</i> BXMA4-2 | <i>Curvularia veruculosa</i> BXMA2-2 |
| 400                               | 100±0                        | 84.5±0.4                         | 72.6±0.3                                        | 79.0±0.4                            | 97.2±0.7                                 | 86.8±0.7                                 | 79.0±0.2                         | 70.5±0.1                               | 88.7±0.1                             |
| 450                               | 99.9±0                       | 91.1±0.5                         | 79.4±0.5                                        | 80.7±0.6                            | 99.0±0.5                                 | 95.6±0.7                                 | 86.9±0.5                         | 78.5±0.4                               | 89.4±0.3                             |
| 500                               | 100±0                        | 92.3±0.5                         | 81.6±0.4                                        | 80.8±0.4                            | 100±0                                    | 95.8±0.5                                 | 88.6±0.9                         | 81.4±0.9                               | 89.9±0.3                             |
| 550                               | 100±0                        | 92.5±0.3                         | 82.8±0.4                                        | 80.7±0.3                            | 100±0                                    | 96.7±0.3                                 | 89.7±0.3                         | 82.8±0.7                               | 90.5±0.1                             |
| 600                               | 100±0                        | 93.4±0.3                         | 83.1±0.8                                        | 80.9±0.7                            | 99.8±0.2                                 | 97.1±0.3                                 | 91.0±0.6                         | 83.5±0.5                               | 91.0±0.9                             |
| 650                               | 100±0                        | 94.0±0.7                         | 84.0±0.6                                        | 80.5±0.9                            | 100±0                                    | 97.5±0.5                                 | 92.3±0.4                         | 84.5±0.6                               | 91.7±0.2                             |
| 700                               | 100±0                        | 94.8±0.6                         | 84.3±0.5                                        | 80.5±0.2                            | 100±0                                    | 97.7±0.9                                 | 92.7±0.3                         | 83.5±0.7                               | 91.2±0.8                             |
| 750                               | 99.9±0.1                     | 95.5±0.5                         | 85.5±0.4                                        | 79.9±0.6                            | 99.9±0.1                                 | 98.7±0.3                                 | 93.4±0.3                         | 84.9±0.8                               | 92.6±0.6                             |
| 800                               | 99.8±0.1                     | 96.7±0.6                         | 86.2±0.5                                        | 80.9±0.7                            | 99.2±0.6                                 | 100±0                                    | 94.7±0.1                         | 84.9±0.3                               | 93.4±0.8                             |
| Average                           | 99.96                        | 92.76                            | 82.17                                           | 80.43                               | 99.46                                    | 96.21                                    | 89.81                            | 81.61                                  | 90.93                                |

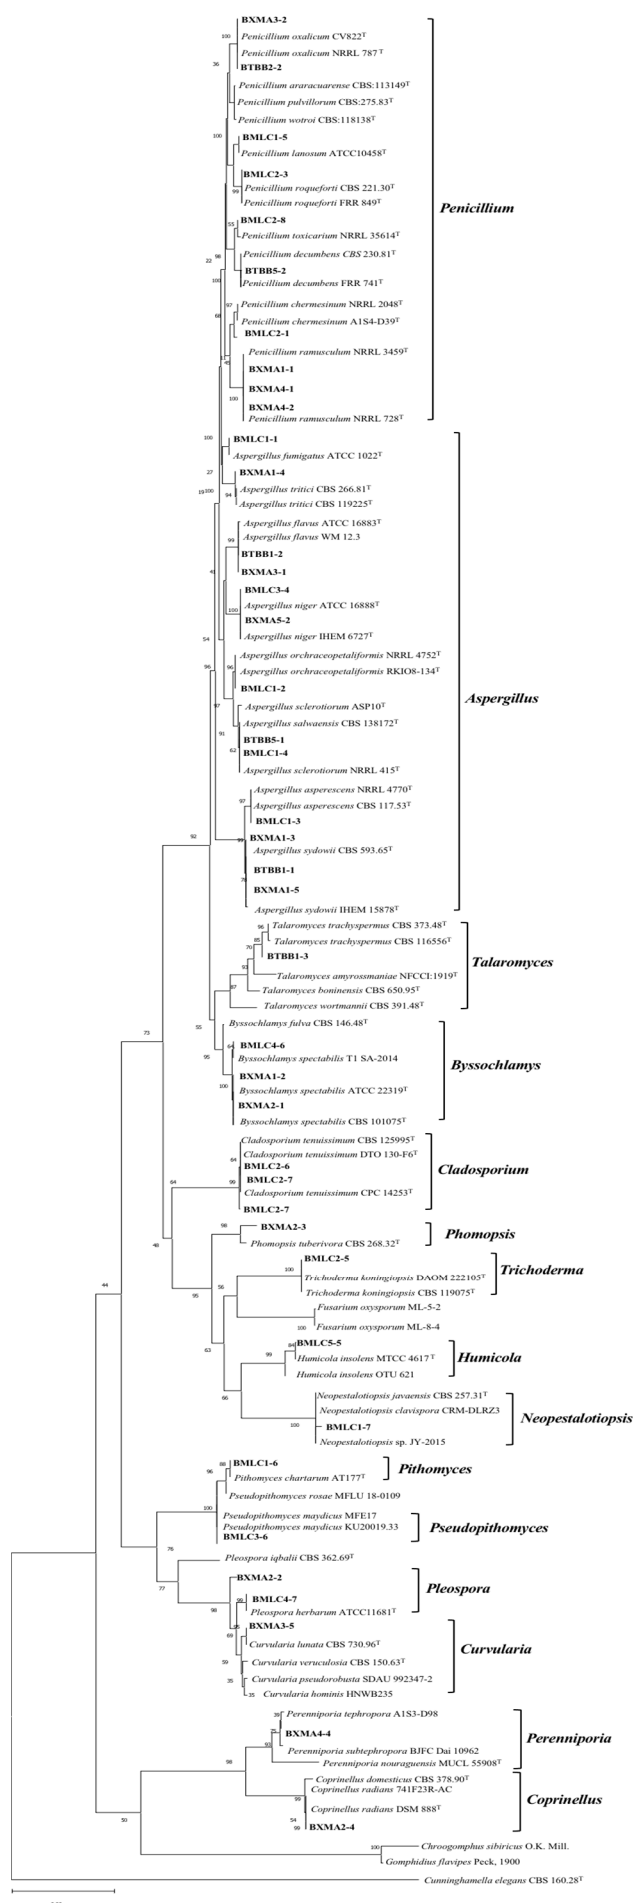

**Figure S1.** Clustering tree from the maximum likelihood analysis of all fungi isolated from binocular eyepieces using ITS sequences. *Cunninghamella elegans* CBS 160.28<sup>T</sup> was selected as the outgroup taxon and 100 % bootstrap values indicate the relevant internode. Identified strains are indicated in bold.
